1 **The Prevalence of Imposter Phenomenon in (Post)graduate Medical Education**

2 *Short Title: Prevalence of IP in PGME*

3 Authors: Jessica Cheung MD, Matthew Sibbald MD PhD, Brandon Ruan BHSc, Jonathan

4 Sherbino, MD Med

5

6 Jessica Cheung, Department of Emergency Medicine, Mississauga Hospital, Trillium Health

7 Partners

8 Matthew Sibbald, Scientist, McMaster Education Research, Innovation and Theory (MERIT)

9 program, Faculty of Health Sciences, McMaster University

10 Brandon Ruan, Research Assistant, MERIT, Faculty of Health Sciences, McMaster University

11 Jonathan Sherbino, Assistant Dean, MERIT, Faculty of Health Sciences, McMaster University

12

13 Corresponding Author:

14 Dr. Jonathan Sherbino

15 C/O MERIT Rm 5003/A

16 100 Main Street West

17 Hamilton, Ontario

18 L8P 1H6

19 (Ph): [\(905\) 525-9140 x 20061](tel:(905)525-9140x20061)

20 Email: [sherbino@mcmaster.ca](mailto:sherbino@mcmaster.ca)

21

22 Tables: 2

23 Supplementary Appendix: 1

24 **Phenomenon**

25 Imposter phenomenon (IP) is the feeling of inadequacy despite demonstrating external standards  
26 of success. Few studies have broadly examined the prevalence of IP in resident-physicians. This  
27 study assessed the prevalence of self-reported IP in resident-physicians, exploring the correlation  
28 of demographic risk factors and feelings of IP.

29 **Approach**

30 All residents, across all years of training and programs at McMaster University during the 2019-  
31 2020 academic year were recruited to complete a self-report survey. Survey items gathered  
32 demographic information and measured self-reported feelings of IP and Clance Imposter  
33 Phenomenon Scale (CIPS) scores.

34 **Findings**

35 519 out of 977 (53.1%) individuals completed the survey. Measured by the CIPS, clinically  
36 significant IP occurred in 59.2% (n=307) of participants. After completing the CIPS, participants  
37 self-reported feelings of low (25.0%, n=130), medium (41.9%, n=218), high (19.0%, n=99), and  
38 intense (3.7%, n= 19) IP. 64.9% (n=337) of respondents felt they hid feelings of IP during  
39 residency. 62.4% (n=324) of respondents were unaware of resources available to them as they  
40 struggled with feelings of IP. Only female gender was associated with IP ( $p < 0.001$ ).

41 **Insights**

42 IP is highly prevalent across a broad range of residents, independent of clinical discipline and  
43 most demographics. Educators and administrators should attend to IP by normalizing the  
44 discussion of IP and ensuring adequate access to resources for support.

45 **Keywords**

46 Imposter phenomenon, graduate medical education, professional identity

47 **Phenomenon**

48 Few studies have broadly examined the prevalence of imposter phenomenon (IP) in  
49 resident-physicians. IP is the feeling of inadequacy despite demonstrating external standards of  
50 success.<sup>1</sup> Individuals with feelings of IP often fear exposure of being a fraud and attribute their  
51 success to external causes such as charm, luck and hard work, rather than internal causes such as  
52 demonstrated intelligence, competence, or ability.<sup>2</sup> Once a task is assigned, individuals with IP  
53 either over-prepare or procrastinate. When the task is accomplished, however, any positive  
54 feedback is discounted by an individual with IP. Those who achieved the task through over-  
55 preparation attribute success to external causes, such as hard work, rather than internal sources,  
56 such as ability. Equally, achievement associated with procrastination is attributed to external  
57 causes, such as luck.<sup>2</sup> Subsequently, both approaches lead to worsening feelings of fraudulence,  
58 self-doubt, and increased IP.

59 Imposter phenomenon has been studied in various groups, including women,<sup>2,3</sup>  
60 undergraduate students, graduate students, nursing students, and business professionals.<sup>1,4</sup>  
61 Studies have shown that individuals experiencing IP are at risk of also experiencing  
62 psychological distress from self-oriented perfectionism,<sup>5-7</sup> anxiety, depression, and low self-  
63 confidence.<sup>8-9</sup>

64 A review of the literature reveals five studies that examined features of IP in attending  
65 physicians.<sup>10-14</sup> Only four small studies, ranging from 48 to 185 participants, have assessed IP in  
66 postgraduate medical education: one study of family medicine residents,<sup>15</sup> two studies of  
67 internal medicine residents,<sup>16-17</sup> and one study of general surgery residents.<sup>14</sup> There have been no  
68 studies to date that assess IP in postgraduate medical education across all specialties, in all years  
69 of training.

70 Recognizing the impact of IP on physician mental health and a lack of research on the  
71 prevalence of IP among resident-physicians, the objective of this study was to assess the  
72 prevalence of IP in all postgraduate medical education physician-residents at a large Canadian  
73 university, and to identify demographic risk factors associated with feelings of IP.

74

## 75 **Approach**

76 An online survey was administered to all residents enrolled in a McMaster University  
77 residency training program between March 3 and 10, 2020. Thus, the recruitment period began  
78 on March 3, 2020 and concluded on March 10, 2020. Participation in this between-subjects study  
79 was voluntary and written informed consent was obtained through email. There were no minors  
80 recruited in this study.

81 The survey consisted of questions on participant demographics, self-perceived IP,  
82 available resources to combat IP, and self-rating on the Clance Imposter Phenomenon Scale  
83 (CIPS). CIPS is a research standard, peer reviewed instrument to measure IP.<sup>18-19</sup> CIPS consists  
84 of 20 questions on a 5-point Likert scale from “not at all true” to “very true.” The questions self-  
85 assess agreement with statements regarding task completion and performance evaluation. No  
86 modifications were made to the instrument. Total scores range from 20 to 100. A total score of  
87 40 or less indicates few IP experiences, a score between 41 and 60 indicating moderate IP  
88 experiences, a score of 61 to 80 indicating frequent IP experiences, and a score of 81 to 100  
89 indicating intense IP experiences. Clance established a score of 62 or greater to indicate  
90 clinically significant IP, meeting criteria to be diagnosed as an imposter.<sup>19</sup> This cut point in the  
91 original research on IP ensures no false negatives and minimal false positive determinations of

92 IP. It is the current standard for using CIPS. Self-perceived IP was measured to determine if a  
93 simpler instrument could replace CIPS.

94 Two faculty members and two research assistants piloted tested the survey for clarity and  
95 usability. They subsequently participated in cognitive interviews conducted by the senior  
96 investigator, who has experience in survey design, to identify necessary modifications to the  
97 final version of the survey instrument. See the supplementary appendix (S1-S2) for the survey  
98 instrument. A link to the survey was emailed once a week for a total of four weeks. All survey  
99 responses were anonymized; data was unavailable to program directors and administrators.

100 Survey data was reported using descriptive statistics. Univariate analysis of variance was  
101 performed to compare CIPS scores across categorical variables. Accepting a 5% probability of  
102 type I error, the threshold for statistical significance was set at a  $p < 0.006$  based on a Bonferonni  
103 correction for multiple comparisons.<sup>20</sup> Self-report of IP and CIPS scores were compared using a  
104 weighted kappa given the ordinal nature of both variables. Statistics were performed using SPSS  
105 Software version 26 (IBM, Redmond). Free text responses were aggregated into conceptual  
106 categories.<sup>21</sup>

107 The study was approved by the Hamilton Integrated Research Ethics Board (protocol  
108 number: 4597).

109

## 110 **Findings**

111 Of the 977 residents invited to participate in the study, 519 completed the survey  
112 (53.1%). Table 1 reports participant demographics.

113 *Table 1: Participant Demographics*

---

Frequency (%)

---

---

| <b>Gender</b>        |             |
|----------------------|-------------|
| Male                 | 208 (40.1%) |
| Female               | 302 (58.2%) |
| Non-Binary           | 2 (0.4%)    |
| Prefer not to answer | 7 (1.3%)    |

---

| <b>Age</b> |             |
|------------|-------------|
| 20-25      | 62 (11.9%)  |
| 26-30      | 305 (58.8%) |
| 31-35      | 119 (22.9%) |
| 20-25      | 62 (11.9%)  |
| 36-40      | 27 (5.2%)   |
| 41-45      | 6 (1.2%)    |

---

| <b>PGY Year</b>    |             |
|--------------------|-------------|
| PGY 1              | 153 (29.5%) |
| PGY 2              | 142 (27.4%) |
| PGY 3              | 71 (13.7%)  |
| PGY 4              | 77 (14.8%)  |
| PGY 5              | 60 (11.6%)  |
| PGY 6              | 14 (2.7%)   |
| PGY 7 and/or above | 2 (0.4%)    |

---

| <b>Specialty</b>  |             |
|-------------------|-------------|
| Family Medicine   | 148 (28.5%) |
| Internal Medicine | 84 (16.2%)  |
| Pediatrics        | 38 (7.3%)   |
| Psychiatry        | 33 (6.4%)   |

|                                                                                                                                     |             |
|-------------------------------------------------------------------------------------------------------------------------------------|-------------|
| Obstetrics and Gynecology                                                                                                           | 27 (5.2%)   |
| Emergency Medicine                                                                                                                  | 27 (5.2%)   |
| *Other Surgical Programs (Cardiac Surgery, Neurosurgery, Otolaryngology, Ophthalmology, Plastic Surgery, Urology, Vascular Surgery) | 25 (4.8%)   |
| General Surgery                                                                                                                     | 23 (4.4%)   |
| *Other (Dermatology, Medical Microbiology, Public Health, Radiation Oncology)                                                       | 23 (4.4%)   |
| Anesthesiology                                                                                                                      | 20 (3.9%)   |
| Orthopedic Surgery                                                                                                                  | 17 (3.3%)   |
| Diagnostic Radiology                                                                                                                | 17 (3.3%)   |
| Neurology                                                                                                                           | 13 (2.5%)   |
| Physical Medicine and Rehabilitation                                                                                                | 13 (2.5%)   |
| *Anatomic and General Pathology                                                                                                     | 11 (2.1%)   |
| <b>Residency Status</b>                                                                                                             |             |
| <hr/>                                                                                                                               |             |
| Canadian medical school graduate                                                                                                    | 438 (84.4%) |
| Non-Canadian medical school graduate                                                                                                | 64 (12.3%)  |
| <b>Marital Status</b>                                                                                                               |             |
| <hr/>                                                                                                                               |             |
| Single                                                                                                                              | 259 (49.9%) |
| Married/Common Law                                                                                                                  | 239 (46.1%) |
| <b>Status of Dependant</b>                                                                                                          |             |
| <hr/>                                                                                                                               |             |
| Yes                                                                                                                                 | 73 (14.1%)  |
| No                                                                                                                                  | 440 (84.8%) |
| <b>Frequency of Evaluation</b>                                                                                                      |             |
| <hr/>                                                                                                                               |             |
| Weekly                                                                                                                              | 190 (36.6%) |
| Daily                                                                                                                               | 177 (34.1%) |

|                                |             |
|--------------------------------|-------------|
| Monthly                        | 72 (13.9%)  |
| Every 2 weeks                  | 43 (8.3%)   |
| Less often than once per month | 28 (5.4%)   |
| Not sure/prefer not to report  | 9 (1.7%)    |
| <b>Academic Remediation</b>    |             |
| <hr/>                          |             |
| Yes                            | 23 (4.4%)   |
| No                             | 489 (94.2%) |

114 \*Aggregated to protect anonymity of respondents from small residency programs.

115  
116 Clinically significant IP, as measured by a CIPS score greater than 61, occurred in 59.2%  
117 (n=307) of participants. CIPS scores of high (score of 60-79) or intense (80-100) IP occurred in  
118 46.8% (n=243) and 14.6% (n=76) participants, respectively. Participants self-report of whether  
119 they have IP and their degree of IP demonstrated low (25.0%, n=130), medium (41.9%, n=218),  
120 high (19.0%, n=99), and intense (3.7%, n= 19) IP. 10.4% of participants (n = 54) reported no  
121 feelings of IP. Self-reported feelings of IP correlated moderately with CIPS (weighted kappa =  
122 0.58).

123 Female gender was the only demographic factor that contributed to variance in CIPS  
124 scores. Participants identifying as female (n=302) had a mean CIPS score of 66, compared to  
125 mean CIPS score of 61 in respondents who identified as male (n=208) and a mean CIPS score of  
126 59 in respondents who identified as nonbinary/preferred not to report (n=9) (p <0.001). Older  
127 age, marital status, being a parent, postgraduate year training level, clinical specialty,  
128 international medical graduate status, frequency of assessments in residency, and previous  
129 academic remediation did not predict IP. (See the supplementary appendix, S3, for all  
130 comparisons.)



131            Approximately two-thirds (64.9%, n=337) of respondents hid their feelings of inadequacy  
132 during residency. Similarly, nearly two-thirds (62.4%, n=324) of respondents were previously  
133 unaware of resources to help them address IP. Table 2 includes resources that participants  
134 identified as potentially helpful for addressing IP.

135 *Table 2: List of support networks that residents consult for feelings of imposter phenomenon*  
136

| Category                                                   | Frequency |
|------------------------------------------------------------|-----------|
| University-approved Counsellor/Social worker/Wellness Team | 126       |
| Private Counsellor/Social Worker/Psychologist/Psychiatrist | 119       |
| Program Director or Program Admin                          | 117       |
| University Administration                                  | 66        |
| Friends & Family                                           | 15        |
| Resident Network                                           | 10        |
| Mindfulness Resources                                      | 6         |
| Colleagues                                                 | 5         |

137

### 138 **Insights**

139            This study suggests a high prevalence of imposter phenomenon in residents, across a  
140 diversity of clinical disciplines. A majority of participants (59.2%) met the standard of clinically  
141 significant IP as measured by the CIPS.

142            This study demonstrates a greater pervasiveness of IP in residents across a diversity of  
143 disciplines as compared to smaller, single-specialty studies (33% in family medicine residents<sup>15</sup>  
144 and approximately 40% in internal medicine residents.<sup>16</sup>) The majority of respondents hid their  
145 feelings of inadequacy. Fear of discrimination, remediation, impact on academic and  
146 employment opportunities may play a role in preventing a resident from identifying their IP and

147 seeking formal support from educators and program administrators. Most respondents were  
148 unaware of available resources.

149 Educators and administrators should attend to IP by normalizing the discussion of IP and  
150 ensuring adequate access to resources for support. Several studies have looked at successful  
151 implementation of low-cost resiliency curricula, which may help address root causes of IP.<sup>22-23</sup>  
152 Resiliency curricula have incorporated strategies including meditation, behavioral skills, setting  
153 realistic goals, managing expectations, and gratitude exercises in both didactic and group-based  
154 delivery.<sup>24-26</sup> A systematic review identified resiliency workshops and cognitive behavioral  
155 training as the strongest interventions for developing healthcare worker resilience.<sup>27</sup> The impact  
156 of all of these interventions at ameliorating physician IP is modest. The study by Gottlieb et al.,  
157 found that social supports, validation of success, and personal as well as shared reflections were  
158 protective against IP.<sup>4</sup> Education curricula that include peer-to-peer support, endorse sharing of  
159 failures and celebrating success may ameliorate the impact of IP on individuals.

160 An alternative interpretation of the high prevalence of IP is that signals a fundamental  
161 dysfunction of residency education. The rate of burnout in residents has remained unchanged  
162 over the past two decades despite substantive world-wide increases in policies and educational  
163 interventions targeting resident needs.<sup>28</sup> Like burnout, IP may be correlated to the system of  
164 education, where interventions targeting the resident may be inefficient or ineffective.<sup>29</sup> Future  
165 research should address system changes to ameliorate IP, rather than focusing exclusively on the  
166 learner.

167 This study suggests a difference in CIPS stratified by gender. While females had a mean  
168 CIP score consistent with clinically significant IP, males had a mean CIP score just below the  
169 cutoff for clinically significant IP. A systematic review by Bravata et al. examined IP and

170 gender.<sup>3</sup> Sixteen studies found IP to be higher in females than in males, while 17 studies found  
171 no difference. A review by Gottlieb et al.<sup>4</sup>, focused on physicians, found 5 studies where IP was  
172 more prevalent in women in both undergraduate<sup>5, 30,31</sup> and postgraduate training,<sup>15,16</sup> while a  
173 similar number of studies found no gender differences.<sup>14,17, 32-34</sup> Within medicine, there remains  
174 significant gender inequality in leadership roles, remuneration, and career trajectories.<sup>35</sup> Tackling  
175 these inequities represents a potential systematic approach to reducing IP which has been  
176 highlighted in recent reviews. Suggested interventions include: tackling persistent institutional  
177 stereotypes, educational interventions to address microaggressions, increasing diversity via  
178 recruitment and enacting systematic process for equitable treatment of all groups.<sup>36,37</sup> While  
179 contributing elements are multifactorial and systems are complex, future research about IP  
180 should assess the association of IP, gender, and other inequities in medicine.

181 Participants were asked “do you think you have features of imposter phenomenon?” and  
182 “... how strong are your feelings...?” The prevalence of self-perceived IP was similar to CIPS  
183 scores. However, self-determination of IP is insufficiently correlated to the 20-question CIPS to  
184 justify adoption of a simpler instrument.

185 As a Canadian, single-center study, the generalizability of these findings to other centers  
186 or jurisdictions is limited. However, it is the largest and only multi-specialty resident study to  
187 date, improving on previous much smaller and discipline-specific studies. The study is also  
188 limited by a design that relies on self-reported data. However, this is a feature notable in all the  
189 IP literature. Women and non-surgical specialties are over-represented among respondents. Non-  
190 responders may reflect different perceptions about IP. In theory, non-responders could counter  
191 the strong signal from participants, mitigating the study conclusions. While self-report data is  
192 readily influenced by social desirability bias, we believe the strong endorsement for a negative

193 attribute suggests this may not be a substantive limitation of this study.

194

## 195 **Conclusions**

196 In a large, single-centre study, there is a high prevalence of imposter phenomenon in  
197 residents, independent of clinical discipline and most demographic factors. Educators and  
198 administrators should normalize the discussion of IP and provide resources so that residents and  
199 residency programs can address feelings of inadequacy.

200 **Acknowledgements**

201 The authors thank Drs. Mark Crowther (Chair, Department of Medicine, McMaster University)  
202 and Parveen Wasi (Associate Dean, Postgraduate Medical Education, McMaster University) for  
203 support in completing this study. The authors also thank Heba Khan (MERIT research assistant)  
204 for help in manuscript preparation.

205

206 **Disclosures**

207 The authors report no conflicts of interest.

208

209 **Ethical Approval**

210 This study was approved by the Hamilton Integrated Research Ethics Board (protocol number:  
211 4597).

## 212 **References**

- 213 1. Bravata DM, Watts SA, Keefer AL et al. Prevalence, predictors, and treatment of impostor  
214 syndrome: a systematic review. *J. Gen. Intern. Med.* 2020;35(4):1252-1275.
- 215 2. Clance PR, Imes SA. The imposter phenomenon in high achieving women: Dynamics and  
216 therapeutic interventions. *Psychol. Psychother.* 1978; 15(3):241-247.
- 217 3. Clance PR, Dingman D, Reviere SL, Stober DR. Impostor phenomenon in an  
218 interpersonal/social context: Origins and treatment. *WOTHDJ.* 1995;16(4):79-96.
- 219 4. Gottlieb M, Chung A, Battaglioli N, Sebok-Syer SS, Kalantari A. Impostor syndrome among  
220 physicians and physicians in training: A scoping review. *Med Educ.*2020; 54(2):116-124.
- 221 5. Henning K, Ey S, Shaw D. Perfectionism, the impostor phenomenon and psychological  
222 adjustment in medical, dental, nursing and pharmacy students. *Med Educ.*1998;32(5):456-464.
- 223 6. Dudău DP. The relation between perfectionism and impostor phenomenon. *Procedia Soc.*  
224 2014;127:129-133
- 225 7 Pannhausen S, Klug K, Rohrman S. Never good enough: The relation between the impostor  
226 phenomenon and multidimensional perfectionism. *Curr Psychol.* 2020:1-14
- 227 8. Bernard NS, Dollinger SJ, Ramaniah NV. Applying the big five personality factors to the  
228 impostor phenomenon. *J. Pers. Assess.*2002;78(2):321-333
- 229 9 Cusack CE, Hughes JL, Nuhu N. Connecting gender and mental health to imposter  
230 phenomenon feelings. *Psi Chi J. Psychol. Res.* 2013; 18(2): 74-81
- 231 10. LaDonna KA, Ginsburg S, Watling C. Rising to the level of your incompetence: Exploring  
232 what physicians' self-assessment of their performance reveals about the impact of the imposter  
233 syndrome in medicine. *Acad Med.*2018; 93(5):763-768.
- 234 11. Kamarzarrin H, Khaledian M, Shooshtari M, Yousefi E, Ahrami R. A study of the

- 235 relationship between self-esteem and the imposter phenomenon in the physicians of Rasht city.  
236 *Eur J Exp Biol.* 2013;3(2):363-366.
- 237 12. Hutchins HM, Rainbolt H. What triggers imposter phenomenon among academic faculty? A  
238 critical incident study exploring antecedents, coping, and development opportunities. *Hum*  
239 *Resource Dev Int.* 2017;20(3):194-214.
- 240 13. Hutchins HM, Penney LM, Sublett LW. What imposters risk at work: exploring imposter  
241 phenomenon, stress coping, and job outcomes. *Hum Res Dev Q.* 2018;29(1):31-48.
- 242 14. Leach PK, Nygaard RM, Chipman JG, Brunsvold ME, Marek AP. Impostor phenomenon  
243 and burnout in general surgeons and general surgery residents. *J Surg Educ.* 2019;76(1):99-106.
- 244 15. Oriol, K. Family medicine residents and the impostor phenomenon. *Fam Med.* 2004,  
245 36(4):248-252.
- 246 16. Legassie J, Zibrowski EM, Goldszmidt MA. Measuring resident well-being: impostorism and  
247 burnout syndrome in residency. *J Gen Intern Med.* 2008; 23(7):1090-1094.
- 248 17. Mascarenhas VR, D'Souza D, Bicholkar A. Prevalence of impostor phenomenon and its  
249 association with self-esteem among medical interns in Goa, India. *Int J Community Med Public*  
250 *Health.* 2019;6(1):355-359.
- 251 18. Chrisman SM, Pieper WA, Clance PR, Holland CL, Glicakuf-Hughes C. Validation of the  
252 Clance imposter phenomenon scale. *J. Pers. Assess.* 1995;65(3):456-467.
- 253 19. Holmes SW, Kertay L, Adamson LB, Holland CL, Clance PR. Measuring the impostor  
254 phenomenon: A comparison of Clance's IP Scale and Harvey's IP Scale. *J. Pers. Assess.* 1993;  
255 60(1): 48-59.
- 256 20. Hochberg Y, Tamhane AC. Multiple comparison procedures. *JWS.* 1987 ;52(1):21-37
- 257 21. Jackson KM, Trochim WM. Concept mapping as an alternative approach for the analysis of

- 258 open-ended survey responses. *Organ. Res. Methods*.2002;5(4):307-336
- 259 22. Seo C, Corrado M, Fournier K, Bailey T, Haykal KA. Addressing the physician burnout  
260 epidemic with resilience curricula in medical education: a systematic review. *BMC Med. Educ.* 2021;21(1):1-25.
- 262 23. Fox S, Lydon S, Byrne D, Madden C, Connolly F, O'Connor P. A systematic review of  
263 interventions to foster physician resilience. *Postgrad. Med. J.* 2018;94(1109):162-170.
- 264 24. Chaukos D, Chad-Friedman E, Mehta DH, et al. Risk and resilience factors associated with  
265 resident burnout. *Acad Psychiatry*.2017;41(2)189-194
- 266 25. Aggarwal R, Deutsch JK, Medina Jm Kothari N. Resident wellness: an intervention to  
267 decrease burnout and increase resiliency and happiness. *MedEdPORTAL*: 2017;13:10651
- 268 26. Bird AN, Martinchek M, Pincavage AT. A curriculum to enhance resilience in internal  
269 medicine interns. *J. Grad. Med. Educ.*2017;9(5):600-604.
- 270 27. Rogers D. Which educational interventions improve healthcare professionals' resilience?  
271 *Med Teach*. 2016;38(12):1236-1241.
- 272 28. Naji L, Singh B, Shah A, et al. Global prevalence of burnout among postgraduate medical  
273 trainees: a systematic review and meta-regression. *CMAJ*. 2021 Jan 1;9(1):E189-200
- 274 29. Vercio C, Loo LK, Green M, et al. Shifting Focus from Burnout and Wellness toward  
275 Individual and Organizational Resilience. *Teach Learn Med* 2021; 33(5):568-576.
- 276 30. Villwock JA, Sobin LB, Koester LA, Harris TM. Imposter syndrome and burnout among  
277 American medical students: a pilot stud. *Int. J. Med. Educ.*2016 ;7:364-369
- 278 31. Qureshi MA, Taj J, Latif MZ, Rafique S, Ahmed R, Chaudhry MA. Imposter syndrome  
279 among Pakistani medical students. *Ann King Edw Med Univ*. 2017;23(2):107-111.
- 280 32. Swope K, Thompson BM, Haidet P. Imposter phenomenon across the span of medical



- 281 training. *J Gen Intern Med.* 2017;32(Suppl 2):S223.
- 282 33. Egwuruwu JN, Ugwuezumba PC, Ohamaeme MC, et al. Relationship between self-esteem  
283 and impostor syndrome among undergraduate medical students in a Nigerian University. *Int. J*  
284 *Brain Cogn Sci.* 2018; 7(1):9-16.
- 285 34. Ikbaal MY. Prevalence of impostor phenomenon among medical students in a Malaysian  
286 private medical school. *Int. J. Med Stud.*2018;6(2):66-70.
- 287 35. Canadian Medical Association, The Federation of Medical Women of Canada. *Addressing*  
288 *gender equity and diversity in Canada’s medical profession: a review.* Ottawa, ON: Canadian  
289 Medical Association; 2019. Available from: [www.cma.ca/sites/default/files/pdf/Ethics/report-](http://www.cma.ca/sites/default/files/pdf/Ethics/report-2018-equity-diversity-medicine-e.pdf)  
290 [2018-equity-diversity-medicine-e.pdf](http://www.cma.ca/sites/default/files/pdf/Ethics/report-2018-equity-diversity-medicine-e.pdf) Accessed May 9, 2022.
- 291 36. Nadal KL, King R, Sissoko DG, Floyd N, Hines D. The legacies of systemic and internalized  
292 oppression: Experiences of microaggressions, imposter phenomenon, and stereotype threat on  
293 historically marginalized groups. *New Ideas in Psych.* 2021;1(63):100895.
- 294 37. Feenstra S, Begeny CT, Ryan MK, Rink FA, Stoker JI, Jordan J. Contextualizing the  
295 impostor “syndrome”. *Frontiers in psych.* 2020; 13(11):3206.
